# Supplementary material for: Inducible mouse models of colon cancer for the analysis of sporadic and inflammation-driven tumor progression and lymph node metastasis
Source: Springer Nature journal article supplement (doi:10.1038/s41596-020-00412-1), 2020-12-14
Supplement: MOESM1 [file 41596_2020_412_MOESM1_ESM22.pdf]

## Reporting Summary

Nature Research wishes to improve the reproducibility of the work that we publish. This form provides structure for consistency and transparency in reporting. For further information on Nature Research policies, see [Authors & Referees](#) and the [Editorial Policy Checklist](#).

### Statistics

For all statistical analyses, confirm that the following items are present in the figure legend, table legend, main text, or Methods section.

n/a Confirmed

- ☒ ☐ The exact sample size ( $n$ ) for each experimental group/condition, given as a discrete number and unit of measurement
- ☒ ☐ A statement on whether measurements were taken from distinct samples or whether the same sample was measured repeatedly
- ☒ ☐ The statistical test(s) used AND whether they are one- or two-sided  
*Only common tests should be described solely by name; describe more complex techniques in the Methods section.*
- ☒ ☐ A description of all covariates tested
- ☒ ☐ A description of any assumptions or corrections, such as tests of normality and adjustment for multiple comparisons
- ☒ ☐ A full description of the statistical parameters including central tendency (e.g. means) or other basic estimates (e.g. regression coefficient) AND variation (e.g. standard deviation) or associated estimates of uncertainty (e.g. confidence intervals)
- ☒ ☐ For null hypothesis testing, the test statistic (e.g.  $F$ ,  $t$ ,  $r$ ) with confidence intervals, effect sizes, degrees of freedom and  $P$  value noted  
*Give  $P$  values as exact values whenever suitable.*
- ☒ ☐ For Bayesian analysis, information on the choice of priors and Markov chain Monte Carlo settings
- ☒ ☐ For hierarchical and complex designs, identification of the appropriate level for tests and full reporting of outcomes
- ☒ ☐ Estimates of effect sizes (e.g. Cohen's  $d$ , Pearson's  $r$ ), indicating how they were calculated

*Our web collection on [statistics for biologists](#) contains articles on many of the points above.*

### Software and code

Policy information about [availability of computer code](#)

Data collection

n/a

Data analysis

Open source software OsiriX (<https://www.osirix-viewer.com>)  
Commercial software Imaris (Bitplane, Switzerland)

For manuscripts utilizing custom algorithms or software that are central to the research but not yet described in published literature, software must be made available to editors/reviewers. We strongly encourage code deposition in a community repository (e.g. GitHub). See the Nature Research [guidelines for submitting code & software](#) for further information.

### Data

Policy information about [availability of data](#)

All manuscripts must include a [data availability statement](#). This statement should provide the following information, where applicable:

- Accession codes, unique identifiers, or web links for publicly available datasets
- A list of figures that have associated raw data
- A description of any restrictions on data availability

All data generated during this study are included in this published article.

## Field-specific reporting

Please select the one below that is the best fit for your research. If you are not sure, read the appropriate sections before making your selection.

- ☒ Life sciences ☐ Behavioural & social sciences ☐ Ecological, evolutionary & environmental sciences

nature research | reporting summary

Life sciences study design

All studies must disclose on these points even when the disclosure is negative.

Sample size

-

Data exclusions

-

Replication

-

Randomization

-

Blinding

-

## Reporting for specific materials, systems and methods

We require information from authors about some types of materials, experimental systems and methods used in many studies. Here, indicate whether each material, system or method listed is relevant to your study. If you are not sure if a list item applies to your research, read the appropriate section before selecting a response.

Materials & experimental systems

Methods

n/a

Involved in the study

☐

☒

Antibodies

☒

☐

Eukaryotic cell lines

☒

☐

Palaeontology

☐

☒

Animals and other organisms

☒

☐

Human research participants

☒

☐

Clinical data

n/a

Involved in the study

☒

☐

ChIP-seq

☒

☐

Flow cytometry

☒

☐

MRI-based neuroimaging

## Antibodies

Antibodies used

Rat monoclonal anti-BrdU antibody, clone BU1/75 (ICR1), Abcam Cat# ab6326, RRID:AB\_305426  
Rat anti-mouse CD31 AF647 antibody, clone MEC13.3, BioLegend Cat# 102516, RRID:AB\_2161029  
Rabbit anti-mouse Ki67 antibody, clone SP6, Abcam Cat# ab16667, RRID:AB\_302459  
Donkey anti-rabbit IgG AF555, polyclonal, BioLegend Cat# 406412, RRID:AB\_2563181  
Mouse anti-mouse E-Cadherin antibody, clone 36/E-Cadherin (RUO), BD Biosciences Cat# 610182, RRID:AB\_397581  
Rabbit anti-human Zeb1 antibody, polyclonal, Sigma-Aldrich Cat# HPA027524, RRID:AB\_1844977  
Rabbit anti-mouse Zeb1 antibody, polyclonal, Novus Cat# NBP1-05987, RRID:AB\_2273178  
Rabbit anti-mouse Snai1 antibody, clone C15D3, Cell Signaling Technology Cat# 3879, RRID:AB\_2255011  
Rabbit anti-mouse Snai2 antibody, clone C19G7, Cell Signaling Technology Cat# 9585, RRID:AB\_2239535  
Rabbit anti-mouse Twist1, polyclonal, Abcam Cat# ab50581, RRID:AB\_883292  
Rat anti-mouse CD326 AF488 antibody, Clone G8.8, BioLegend Cat# 118210, RRID:AB\_1134099  
Rabbit anti-mouse pStat3 (Tyr705) antibody, Clone D3A7, Cell Signaling Technology Cat# 9145, RRID:AB\_2491009  
Rabbit anti-mouse Vimentin AF488 antibody, Clone D21H3, Cell Signaling Technology Cat# 9854, RRID:AB\_10829352

Validation

-

## Animals and other organisms

Policy information about [studies involving animals](#); [ARRIVE guidelines](#) recommended for reporting animal research

Laboratory animals

Conditional p53 knock-out mice (Tp53ΔIEC), male and female, 8-week old  
Conditional tdTomato reporter mice (ColVICre tdTomato), male and female, 8-week old

Wild animals

-

Field-collected samples

-

Ethics oversight

Government of Middle Franconia and government of Rhineland-Palatinate.

Note that full information on the approval of the study protocol must also be provided in the manuscript.

nature research | reporting summary

October 2018

2
